# Supplementary material for: Co-linearity and divergence of the A subgenome of Brassica juncea compared with other Brassica species carrying different A subgenomes
Source: BMC Genomics. 2016 Jan 5;17:18. doi: 10.1186/s12864-015-2343-1 (PMC4700566; doi:10.1186/s12864-015-2343-1)
Supplement: Additional file 6: — Calculation on the population genetic distance among the three species carrying A genome by resampling. (XLSX 30 kb) [file 12864_2015_2343_MOESM6_ESM.xlsx]

## Sheet: Sheet1
Additional file 6 The Nei's Genetic distance among the three species carrying A genome by resampling
Resampling	B. rapa VS B. napus		B. rapa VS B. juncea		B. juncea VS B. napus
	Analysis with ABC-markers	Analysis with A genome specific markers	Analysis with ABC-markers	Analysis with A genome specific markers	Analysis with ABC-markers	Analysis with A genome specific markers
All the accessions	0.248584	0.217026	0.463876	0.186426	0.691717	0.310453
Resample 1	0.279072	0.287457	0.510323	0.242232	0.761481	0.40549
Resample 2	0.262698	0.271204	0.461847	0.219397	0.690601	0.336583
*Resample 1 and resample 2 separately present the results calculation on three diverse lines of each species all originated from China; and four diverse lines originated from China and other countries.
